# Supplementary material
Source: PubMed Central journal article supplement (PMC2964840)
Supplement: NIHMS242314-supplement-supplementary_data.pdf [file NIHMS242314-supplement-supplementary_data.pdf]

Figure 1 sup

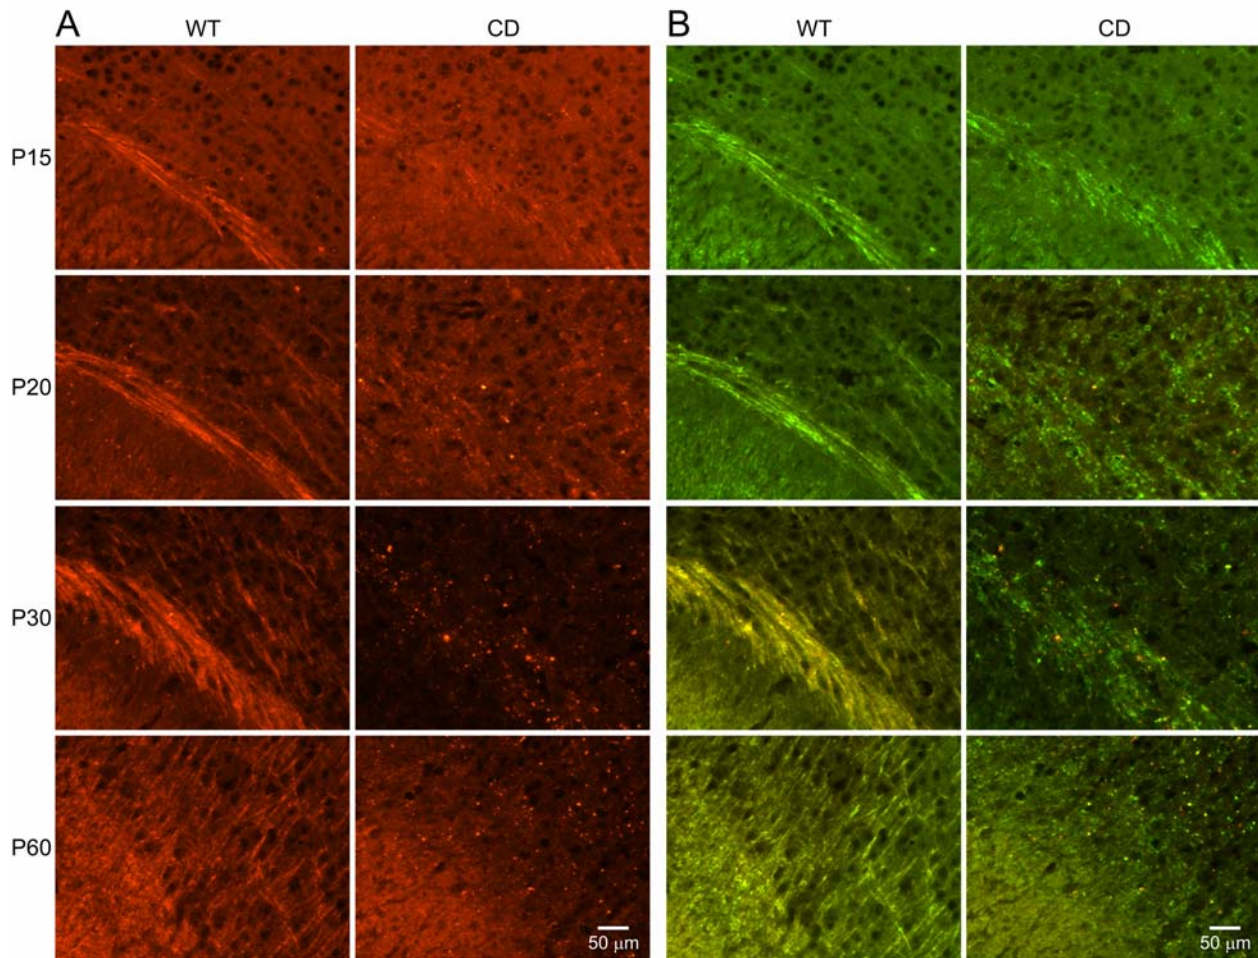

**Supplemental Figure 1:** Decreased myelin protein expression. A) Decreased immunostaining with PLP can be seen in the white matter and cortical regions in CD mice. B) Merged images of MBP (green) and PLP (red) immunostaining demonstrating a decrease in myelin protein expression. Scale bar = 50um, all the images shown in the different panels were acquired at the same magnification.

Figure 2 sup

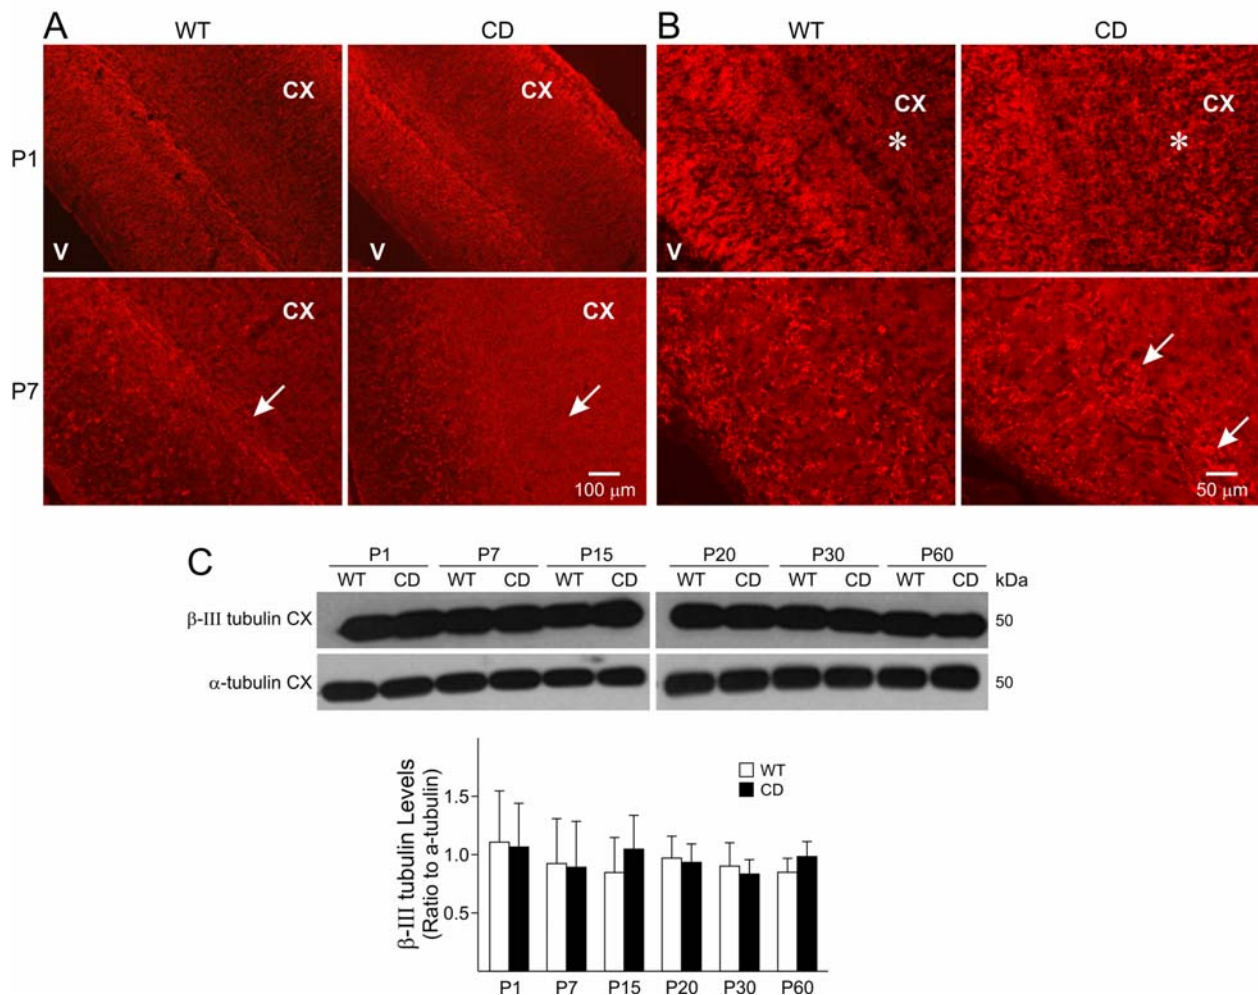

**Supplemental Figure 2:** CD mouse cerebral cortex exhibits abnormal neuronal distribution. A)  $\alpha$ -internexin distribution is abnormal in CD mice at P7. Decreased in expression of  $\alpha$ -internexin can be observed in CD mice (arrows). B) Staining with doublecortin also showed an irregular distribution in CD mice. At P1 doublecortin positive cells can be seen in the cortex of WT mice, which is absent in CD brains (\*) and at P7, doublecortin positive cells form aggregates (arrows). C) Representative western blot showing no difference in  $\beta$ -III tubulin protein levels in the cortex of CD mice compared to WT mice at all ages analyzed. Lower graph represents quantitative analysis of relative expression levels of  $\beta$ -III tubulin normalized to  $\alpha$ -tubulin. Data are shown as the mean + SEM of 3-4 animals/group. CX-cortex, V-ventricle. Scale bar = 50um, all the images shown in the different panels were acquired at the same magnification
